# Supplementary material for: Small Extracellular Vesicles from Hypoxic Triple-Negative Breast Cancer Cells Induce Oxygen-Dependent Cell Invasion
Source: MDPI journal article supplement (doi:10.3390/ijms232012646), 2022-10-21
Supplement: s1 [file s1]

**Supplementary Table S1.** Differential proteomic profile of SEVh ( $p < 0.01$ )

| Protein Code                         | Protein Name                                                                                                                                                                                                                | t.stat  | p value  | - log10(p) | FDR*     |
|--------------------------------------|-----------------------------------------------------------------------------------------------------------------------------------------------------------------------------------------------------------------------------|---------|----------|------------|----------|
| ISG15                                | Ubiquitin-like protein ISG15                                                                                                                                                                                                | 196.650 | 4.01E-09 | 8.397      | 9.59E-06 |
| PR40A                                | Pre-mRNA-processing factor 40 homolog A                                                                                                                                                                                     | 80.288  | 1.44E-07 | 6.841      | 1.72E-04 |
| MTOR                                 | Serine/threonine-protein kinase mTOR                                                                                                                                                                                        | 60.318  | 4.52E-07 | 6.344      | 3.60E-04 |
| IMA5                                 | Importin subunit alpha-5                                                                                                                                                                                                    | 48.570  | 1.08E-06 | 5.969      | 5.40E-04 |
| RL36                                 | 60S ribosomal protein L36                                                                                                                                                                                                   | 47.965  | 1.13E-06 | 5.947      | 5.40E-04 |
| HNRL2                                | Heterogeneous nuclear ribonucleoprotein U-like protein 2                                                                                                                                                                    | 40.705  | 2.18E-06 | 5.662      | 8.42E-04 |
| PKN2                                 | Serine/threonine-protein kinase N2                                                                                                                                                                                          | 38.313  | 2.77E-06 | 5.557      | 8.42E-04 |
| CHERP                                | Calcium homeostasis endoplasmic reticulum protein                                                                                                                                                                           | 35.985  | 3.56E-06 | 5.449      | 8.42E-04 |
| RO60                                 | RNA-binding protein RO60                                                                                                                                                                                                    | 35.466  | 3.77E-06 | 5.423      | 8.42E-04 |
| MRCKB                                | Serine/threonine-protein kinase MRCK beta                                                                                                                                                                                   | 34.954  | 4.00E-06 | 5.398      | 8.42E-04 |
| ENOG                                 | Gamma-enolase                                                                                                                                                                                                               | 34.607  | 4.16E-06 | 5.381      | 8.42E-04 |
| SNRPA                                | U1 small nuclear ribonucleoprotein A                                                                                                                                                                                        | 34.466  | 4.23E-06 | 5.374      | 8.42E-04 |
| MSH2                                 | DNA mismatch repair protein Msh2                                                                                                                                                                                            | 33.412  | 4.79E-06 | 5.320      | 8.80E-04 |
| TEBP                                 | Prostaglandin E synthase 3                                                                                                                                                                                                  | 30.983  | 6.47E-06 | 5.189      | 1.05E-03 |
| RPTOR                                | Regulatory-associated protein of mTOR                                                                                                                                                                                       | 30.832  | 6.59E-06 | 5.181      | 1.05E-03 |
| DEFI6                                | Differentially expressed in FDCP 6 homolog                                                                                                                                                                                  | 29.611  | 7.75E-06 | 5.111      | 1.12E-03 |
| SMAD3; SMAD5; SMAD1;<br>SMAD2; SMAD9 | Mothers against decapentaplegic homolog 3; Mothers against decapentaplegic homolog 5;<br>Mothers against decapentaplegic homolog 1; Mothers against decapentaplegic homolog 2;<br>Mothers against decapentaplegic homolog 9 | 29.375  | 8.00E-06 | 5.097      | 1.12E-03 |
| MAP1B                                | Microtubule-associated protein 1B                                                                                                                                                                                           | 27.882  | 9.84E-06 | 5.007      | 1.15E-03 |
| DKC1                                 | H/ACA ribonucleoprotein complex subunit DKC1                                                                                                                                                                                | 27.850  | 9.89E-06 | 5.005      | 1.15E-03 |
| DCTN2                                | Dynactin subunit 2                                                                                                                                                                                                          | 27.674  | 1.01E-05 | 4.994      | 1.15E-03 |
| TRA2B                                | Transformer-2 protein homolog beta                                                                                                                                                                                          | 27.669  | 1.01E-05 | 4.994      | 1.15E-03 |
| EIF3H                                | Eukaryotic translation initiation factor 3 subunit H                                                                                                                                                                        | 25.945  | 1.31E-05 | 4.882      | 1.41E-03 |
| MTND                                 | 1,2-dihydroxy-3-keto-5-methylthiopentene dioxygenase                                                                                                                                                                        | 25.713  | 1.36E-05 | 4.867      | 1.41E-03 |
| AQR                                  | RNA helicase aquarius                                                                                                                                                                                                       | 24.715  | 1.59E-05 | 4.798      | 1.58E-03 |
| CMBL                                 | Carboxymethylenebutenolidase homolog                                                                                                                                                                                        | 23.785  | 1.85E-05 | 4.732      | 1.67E-03 |
| OXS1                                 | Serine/threonine-protein kinase OSR1                                                                                                                                                                                        | 23.503  | 1.94E-05 | 4.712      | 1.67E-03 |
| CCZ1; CCZ1B                          | Vacuolar fusion protein CCZ1 homolog; Vacuolar fusion protein CCZ1 homolog B                                                                                                                                                | 23.227  | 2.04E-05 | 4.691      | 1.67E-03 |
| MET                                  | Hepatocyte growth factor receptor                                                                                                                                                                                           | 23.003  | 2.12E-05 | 4.674      | 1.67E-03 |

|                                             |                                                                                                                                                                                                                                                                                                            |        |          |       |          |
|---------------------------------------------|------------------------------------------------------------------------------------------------------------------------------------------------------------------------------------------------------------------------------------------------------------------------------------------------------------|--------|----------|-------|----------|
| CAND1                                       | Cullin-associated NEDD8-dissociated protein 1                                                                                                                                                                                                                                                              | 22.901 | 2.15E-05 | 4.667 | 1.67E-03 |
| RGPD4; RGPD3; RGPD1;<br>RGPD2; RGPD5; RGPD8 | RanBP2-like and GRIP domain-containing protein 4; RanBP2-like and GRIP domain-containing protein 3; RanBP2-like and GRIP domain-containing protein 1; RanBP2-like and GRIP domain-containing protein 2; RanBP2-like and GRIP domain-containing protein 5; RanBP2-like and GRIP domain-containing protein 8 | 22.863 | 2.17E-05 | 4.664 | 1.67E-03 |
| CSTF2                                       | Cleavage stimulation factor subunit 2                                                                                                                                                                                                                                                                      | 22.852 | 2.17E-05 | 4.663 | 1.67E-03 |
| IPO5                                        | Importin-5                                                                                                                                                                                                                                                                                                 | 22.673 | 2.24E-05 | 4.650 | 1.67E-03 |
| PA1B3                                       | Platelet-activating factor acetylhydrolase IB subunit alpha1                                                                                                                                                                                                                                               | 22.051 | 2.50E-05 | 4.602 | 1.78E-03 |
| MAP4                                        | Microtubule-associated protein 4                                                                                                                                                                                                                                                                           | 21.890 | 2.58E-05 | 4.589 | 1.78E-03 |
| YTHD3; YTHD1                                | YTH domain-containing family protein 3; YTH domain-containing family protein 1                                                                                                                                                                                                                             | 21.827 | 2.61E-05 | 4.584 | 1.78E-03 |
| KPCD                                        | Protein kinase C delta type                                                                                                                                                                                                                                                                                | 21.357 | 2.84E-05 | 4.546 | 1.85E-03 |
| GEPH                                        | Gephyrin                                                                                                                                                                                                                                                                                                   | 21.326 | 2.86E-05 | 4.544 | 1.85E-03 |
| CSN7A                                       | COP9 signalosome complex subunit 7a                                                                                                                                                                                                                                                                        | 20.934 | 3.08E-05 | 4.512 | 1.94E-03 |
| AR6P4                                       | ADP-ribosylation factor-like protein 6-interacting protein 4                                                                                                                                                                                                                                               | 20.082 | 3.63E-05 | 4.440 | 2.19E-03 |
| AIMP2                                       | Aminoacyl tRNA synthase complex-interacting multifunctional protein 2                                                                                                                                                                                                                                      | 20.036 | 3.66E-05 | 4.436 | 2.19E-03 |
| CO5A1                                       | Collagen alpha-1(V) chain                                                                                                                                                                                                                                                                                  | 19.801 | 3.84E-05 | 4.416 | 2.24E-03 |
| RS2                                         | 40S ribosomal protein S2                                                                                                                                                                                                                                                                                   | 19.162 | 4.37E-05 | 4.359 | 2.49E-03 |
| ANFY1                                       | Rabankyrin-5                                                                                                                                                                                                                                                                                               | 18.862 | 4.65E-05 | 4.332 | 2.54E-03 |
| SCFD1                                       | Sec1 family domain-containing protein 1                                                                                                                                                                                                                                                                    | 18.843 | 4.67E-05 | 4.331 | 2.54E-03 |
| CHD1                                        | Chromodomain-helicase-DNA-binding protein 1                                                                                                                                                                                                                                                                | 18.682 | 4.83E-05 | 4.316 | 2.54E-03 |
| MET25                                       | Probable methyltransferase-like protein 25                                                                                                                                                                                                                                                                 | 18.622 | 4.89E-05 | 4.310 | 2.54E-03 |
| EI2BD                                       | Translation initiation factor eIF-2B subunit delta                                                                                                                                                                                                                                                         | 18.212 | 5.35E-05 | 4.272 | 2.72E-03 |
| GALT2                                       | Polypeptide N-acetylgalactosaminyltransferase 2                                                                                                                                                                                                                                                            | 18.063 | 5.52E-05 | 4.258 | 2.75E-03 |
| CUTA                                        | Protein CutA                                                                                                                                                                                                                                                                                               | 17.857 | 5.78E-05 | 4.238 | 2.82E-03 |
| RLA2                                        | 60S acidic ribosomal protein P2                                                                                                                                                                                                                                                                            | 17.691 | 6.00E-05 | 4.222 | 2.87E-03 |
| RIR2                                        | Ribonucleoside-diphosphate reductase subunit M2                                                                                                                                                                                                                                                            | 17.556 | 6.18E-05 | 4.209 | 2.90E-03 |
| AP2S1                                       | AP-2 complex subunit sigma                                                                                                                                                                                                                                                                                 | 17.469 | 6.31E-05 | 4.200 | 2.90E-03 |
| KITH                                        | Thymidine kinase. cytosolic                                                                                                                                                                                                                                                                                | 17.357 | 6.47E-05 | 4.189 | 2.92E-03 |
| GFPT2                                       | Glutamine--fructose-6-phosphate aminotransferase [isomerizing] 2                                                                                                                                                                                                                                           | 17.203 | 6.70E-05 | 4.174 | 2.96E-03 |
| MYLK                                        | Myosin light chain kinase. smooth muscle                                                                                                                                                                                                                                                                   | 17.074 | 6.90E-05 | 4.161 | 3.00E-03 |
| TNS2; TENS3; TENS1                          | Tensin-2; Tensin-3; Tensin-1                                                                                                                                                                                                                                                                               | 16.846 | 7.28E-05 | 4.138 | 3.11E-03 |
| VPS36                                       | Vacuolar protein-sorting-associated protein 36                                                                                                                                                                                                                                                             | 16.482 | 7.94E-05 | 4.100 | 3.27E-03 |

|              |                                                                      |        |          |       |          |
|--------------|----------------------------------------------------------------------|--------|----------|-------|----------|
| PAF1         | RNA polymerase II-associated factor 1 homolog                        | 16.479 | 7.94E-05 | 4.100 | 3.27E-03 |
| PALLD        | Palladin                                                             | 16.321 | 8.25E-05 | 4.084 | 3.34E-03 |
| IF4G2        | Eukaryotic translation initiation factor 4 gamma 2                   | 16.113 | 8.68E-05 | 4.062 | 3.46E-03 |
| FPPS         | Farnesyl pyrophosphate synthase                                      | 15.836 | 9.29E-05 | 4.032 | 3.52E-03 |
| ARL1         | ADP-ribosylation factor-like protein 1                               | 15.821 | 9.33E-05 | 4.030 | 3.52E-03 |
| SYMC         | Methionine--tRNA ligase. cytoplasmic                                 | 15.788 | 9.40E-05 | 4.027 | 3.52E-03 |
| SATT         | Neutral amino acid transporter A                                     | 15.774 | 9.44E-05 | 4.025 | 3.52E-03 |
| OGFR         | Opioid growth factor receptor                                        | 15.662 | 9.71E-05 | 4.013 | 3.57E-03 |
| RAB1B        | Ras-related protein Rab-1B                                           | 15.602 | 9.85E-05 | 4.006 | 3.57E-03 |
| CSN5         | COP9 signalosome complex subunit 5                                   | 15.515 | 1.01E-04 | 3.997 | 3.59E-03 |
| RRAGA; RRAGB | Ras-related GTP-binding protein A; Ras-related GTP-binding protein B | 15.436 | 1.03E-04 | 3.988 | 3.61E-03 |
| FXR2         | Fragile X mental retardation syndrome-related protein 2              | 15.097 | 1.12E-04 | 3.950 | 3.89E-03 |
| EXOS3        | Exosome complex component RRP40                                      | 15.027 | 1.14E-04 | 3.942 | 3.90E-03 |
| RB27A        | Ras-related protein Rab-27A                                          | 14.831 | 1.20E-04 | 3.920 | 4.05E-03 |
| CRLD1        | Cysteine-rich secretory protein LCCL domain-containing 1             | 14.651 | 1.26E-04 | 3.899 | 4.09E-03 |
| MCM3         | DNA replication licensing factor MCM3                                | 14.641 | 1.27E-04 | 3.898 | 4.09E-03 |
| ZNT7         | Zinc transporter 7                                                   | 14.639 | 1.27E-04 | 3.897 | 4.09E-03 |
| LANC1        | Glutathione S-transferase LANCL1                                     | 14.513 | 1.31E-04 | 3.883 | 4.14E-03 |
| AP1G1        | AP-1 complex subunit gamma-1                                         | 14.497 | 1.32E-04 | 3.881 | 4.14E-03 |
| GAPD1        | GTPase-activating protein and VPS9 domain-containing protein 1       | 14.033 | 1.50E-04 | 3.825 | 4.64E-03 |
| ARHGI        | Rho guanine nucleotide exchange factor 18                            | 13.628 | 1.68E-04 | 3.775 | 5.08E-03 |
| IFRD2        | Interferon-related developmental regulator 2                         | 13.626 | 1.68E-04 | 3.775 | 5.08E-03 |
| IF4G1        | Eukaryotic translation initiation factor 4 gamma 1                   | 13.450 | 1.77E-04 | 3.753 | 5.28E-03 |
| FERM1        | Fermitin family homolog 1                                            | 13.217 | 1.89E-04 | 3.723 | 5.59E-03 |
| ARGL1        | Arginine and glutamate-rich protein 1                                | 13.099 | 1.96E-04 | 3.708 | 5.72E-03 |
| KCC2D        | Calcium/calmodulin-dependent protein kinase type II subunit delta    | 13.026 | 2.00E-04 | 3.698 | 5.74E-03 |
| HPRT         | Hypoxanthine-guanine phosphoribosyltransferase                       | 13.005 | 2.02E-04 | 3.695 | 5.74E-03 |
| RBM25        | RNA-binding protein 25                                               | 12.929 | 2.06E-04 | 3.685 | 5.76E-03 |
| SEC13        | Protein SEC13 homolog                                                | 12.896 | 2.08E-04 | 3.681 | 5.76E-03 |
| SART3        | Squamous cell carcinoma antigen recognized by T-cells 3              | 12.877 | 2.10E-04 | 3.678 | 5.76E-03 |
| CK098        | Uncharacterized protein C11orf98                                     | 12.827 | 2.13E-04 | 3.672 | 5.78E-03 |
| AP1B1        | AP-1 complex subunit beta-1                                          | 12.759 | 2.17E-04 | 3.663 | 5.83E-03 |

|            |                                                           |        |          |       |          |
|------------|-----------------------------------------------------------|--------|----------|-------|----------|
| PR38B      | Pre-mRNA-splicing factor 38B                              | 12.707 | 2.21E-04 | 3.656 | 5.83E-03 |
| PHF5A      | PHD finger-like domain-containing protein 5A              | 12.690 | 2.22E-04 | 3.654 | 5.83E-03 |
| CAPR1      | Caprin-1                                                  | 12.606 | 2.28E-04 | 3.642 | 5.88E-03 |
| NOP16      | Nucleolar protein 16                                      | 12.593 | 2.29E-04 | 3.640 | 5.88E-03 |
| TBC15      | TBC1 domain family member 15                              | 12.388 | 2.44E-04 | 3.613 | 6.21E-03 |
| PGTB2      | Geranylgeranyl transferase type-2 subunit beta            | 12.319 | 2.49E-04 | 3.603 | 6.28E-03 |
| PPT1       | Palmitoyl-protein thioesterase 1                          | 12.096 | 2.68E-04 | 3.572 | 6.53E-03 |
| IF2B2      | Insulin-like growth factor 2 mRNA-binding protein 2       | 12.091 | 2.68E-04 | 3.571 | 6.53E-03 |
| GCP60      | Golgi resident protein GCP60                              | 12.051 | 2.72E-04 | 3.566 | 6.53E-03 |
| SHSA4      | Protein shisa-4                                           | 12.038 | 2.73E-04 | 3.564 | 6.53E-03 |
| ARF6       | ADP-ribosylation factor 6                                 | 12.037 | 2.73E-04 | 3.564 | 6.53E-03 |
| TCTP       | Translationally-controlled tumor protein                  | 11.969 | 2.79E-04 | 3.554 | 6.59E-03 |
| RFC2       | Replication factor C subunit 2                            | 11.934 | 2.82E-04 | 3.549 | 6.59E-03 |
| SHC1; SHC2 | SHC-transforming protein 1; SHC-transforming protein 2    | 11.898 | 2.86E-04 | 3.544 | 6.59E-03 |
| CPSF1      | Cleavage and polyadenylation specificity factor subunit 1 | 11.890 | 2.87E-04 | 3.543 | 6.59E-03 |
| UBP2L      | Ubiquitin-associated protein 2-like                       | 11.724 | 3.03E-04 | 3.519 | 6.89E-03 |
| PDLI1      | PDZ and LIM domain protein 1                              | 11.656 | 3.10E-04 | 3.509 | 6.98E-03 |
| WDR11      | WD repeat-containing protein 11                           | 11.589 | 3.17E-04 | 3.499 | 7.07E-03 |
| AP2A2      | AP-2 complex subunit alpha-2                              | 11.453 | 3.32E-04 | 3.479 | 7.30E-03 |
| MARE1      | Microtubule-associated protein RP/EB family member 1      | 11.443 | 3.33E-04 | 3.478 | 7.30E-03 |
| SF3B2      | Splicing factor 3B subunit 2                              | 11.380 | 3.40E-04 | 3.469 | 7.39E-03 |
| ARL3       | ADP-ribosylation factor-like protein 3                    | 11.355 | 3.43E-04 | 3.465 | 7.39E-03 |
| CDC16      | Cell division cycle protein 16 homolog                    | 11.224 | 3.59E-04 | 3.445 | 7.66E-03 |
| LARP1      | La-related protein 1                                      | 11.179 | 3.65E-04 | 3.438 | 7.71E-03 |
| B4GA1      | Beta-1.4-glucuronyltransferase 1                          | 11.009 | 3.87E-04 | 3.412 | 7.99E-03 |
| PIP        | Prolactin-inducible protein                               | 11.006 | 3.87E-04 | 3.412 | 7.99E-03 |
| S12A4      | Solute carrier family 12 member 4                         | 10.979 | 3.91E-04 | 3.408 | 7.99E-03 |
| TBB2A      | Tubulin beta-2A chain                                     | 10.933 | 3.98E-04 | 3.401 | 7.99E-03 |
| KLC2       | Kinesin light chain 2                                     | 10.929 | 3.98E-04 | 3.400 | 7.99E-03 |
| ABC3C      | DNA dC->dU-editing enzyme APOBEC-3C                       | 10.926 | 3.98E-04 | 3.400 | 7.99E-03 |
| SPY4       | Protein sprouty homolog 4                                 | 10.907 | 4.01E-04 | 3.397 | 7.99E-03 |
| SREK1      | Splicing regulatory glutamine/lysine-rich protein 1       | 10.861 | 4.08E-04 | 3.389 | 7.99E-03 |

|             |                                                                                         |        |          |       |          |
|-------------|-----------------------------------------------------------------------------------------|--------|----------|-------|----------|
| EMP3        | Epithelial membrane protein 3                                                           | 10.833 | 4.12E-04 | 3.385 | 7.99E-03 |
| SYT1; SYT2  | Extended synaptotagmin-1; Extended synaptotagmin-2                                      | 10.816 | 4.14E-04 | 3.383 | 7.99E-03 |
| ALDOC       | Fructose-bisphosphate aldolase C                                                        | 10.816 | 4.15E-04 | 3.382 | 7.99E-03 |
| CC124       | Coiled-coil domain-containing protein 124                                               | 10.711 | 4.31E-04 | 3.366 | 8.23E-03 |
| TF65        | Transcription factor p65                                                                | 10.670 | 4.37E-04 | 3.360 | 8.29E-03 |
| EXOC1       | Exocyst complex component 1                                                             | 10.626 | 4.44E-04 | 3.353 | 8.36E-03 |
| SAR1A       | GTP-binding protein SAR1a                                                               | 10.588 | 4.50E-04 | 3.347 | 8.41E-03 |
| PSMD8       | 26S proteasome non-ATPase regulatory subunit 8                                          | 10.510 | 4.63E-04 | 3.334 | 8.59E-03 |
| STAM1       | Signal transducing adapter molecule 1                                                   | 10.476 | 4.69E-04 | 3.329 | 8.63E-03 |
| RS3         | 40S ribosomal protein S3                                                                | 10.453 | 4.73E-04 | 3.325 | 8.64E-03 |
| BABA2       | BRISC and BRCA1-A complex member 2                                                      | 10.410 | 4.81E-04 | 3.318 | 8.71E-03 |
| SC16A       | Protein transport protein Sec16A                                                        | 10.377 | 4.87E-04 | 3.313 | 8.74E-03 |
| LYSC        | Lysozyme C                                                                              | 10.360 | 4.90E-04 | 3.310 | 8.74E-03 |
| RUXE        | Small nuclear ribonucleoprotein E                                                       | 10.239 | 5.13E-04 | 3.290 | 9.08E-03 |
| ARF4        | ADP-ribosylation factor 4                                                               | 10.203 | 5.20E-04 | 3.284 | 9.11E-03 |
| CAZA2       | F-actin-capping protein subunit alpha-2                                                 | 10.192 | 5.22E-04 | 3.282 | 9.11E-03 |
| SPY2        | Protein sprouty homolog 2                                                               | 10.154 | 5.30E-04 | 3.276 | 9.17E-03 |
| PURB        | Transcriptional activator protein Pur-beta                                              | 10.134 | 5.34E-04 | 3.273 | 9.18E-03 |
| EIF1; EIF1B | Eukaryotic translation initiation factor 1; Eukaryotic translation initiation factor 1b | 10.096 | 5.42E-04 | 3.266 | 9.20E-03 |
| DEK         | Protein DEK                                                                             | 10.090 | 5.43E-04 | 3.265 | 9.20E-03 |
| ABCF2       | ATP-binding cassette sub-family F member 2                                              | 10.011 | 5.60E-04 | 3.252 | 9.42E-03 |
| GGH         | Gamma-glutamyl hydrolase                                                                | 9.956  | 5.72E-04 | 3.243 | 9.55E-03 |
| DC1L2       | Cytoplasmic dynein 1 light intermediate chain 2                                         | 9.930  | 5.78E-04 | 3.238 | 9.59E-03 |
| UCK2        | Uridine-cytidine kinase 2                                                               | 9.912  | 5.82E-04 | 3.235 | 9.59E-03 |

\* FDR: False discovery rate
