# Supplementary material for: Small Extracellular Vesicles from Hypoxic Triple-Negative Breast Cancer Cells Induce Oxygen-Dependent Cell Invasion
Source: MDPI journal article supplement (doi:10.3390/ijms232012646), 2022-10-21
Supplement: s1 [file s1]

**Table S2.** Differential proteomic profile of MDA-MB-231 cells exposed to normoxia or hypoxia, with or without SEVh treatment (p<0.05)

| Protein Code | Protein Name                                               | <i>f</i> value | <i>p</i> value | - log <sub>10</sub> ( <i>p</i> ) | FDR*     | Tukey's HSD**                                                                                                  |
|--------------|------------------------------------------------------------|----------------|----------------|----------------------------------|----------|----------------------------------------------------------------------------------------------------------------|
| RPAB1        | DNA-directed RNA polymerases I, II, and III subunit RPABC1 | 2900.1         | 1.75E-12       | 11.756                           | 4.58E-09 | Hyp_SEVh x Hyp_PBS<br>Hyp_SEVh x Norm_PBS<br>Norm_SEVh x Hyp_SEVh                                              |
| NPL4         | Nuclear protein localization protein 4 homolog             | 1353.2         | 3.68E-11       | 10.434                           | 4.81E-08 | Hyp_SEVh x Hyp_PBS<br>Hyp_SEVh x Norm_PBS<br>Norm_SEVh x Hyp_SEVh                                              |
| KT3K         | Ketosamine-3-kinase                                        | 965.53         | 1.41E-10       | 9.849                            | 1.23E-07 | Hyp_SEVh x Hyp_PBS<br>Hyp_SEVh x Norm_PBS<br>Norm_SEVh x Hyp_SEVh                                              |
| MRM3         | rRNA methyltransferase 3, mitochondrial                    | 746.72         | 3.94E-10       | 9.405                            | 2.58E-07 | Hyp_SEVh x Hyp_PBS<br>Hyp_SEVh x Norm_PBS<br>Norm_SEVh x Hyp_SEVh                                              |
| ADDA         | Alpha-adducin                                              | 681.92         | 5.66E-10       | 9.247                            | 2.96E-07 | Hyp_SEVh x Hyp_PBS<br>Hyp_SEVh x Norm_PBS<br>Norm_SEVh x Hyp_SEVh                                              |
| GDE          | Glycogen debranching enzyme                                | 576.74         | 1.10E-09       | 8.958                            | 4.80E-07 | Norm_PBS x Hyp_PBS<br>Hyp_SEVh x Hyp_PBS<br>Norm_SEVh x Hyp_PBS                                                |
| GMPR1        | GMP reductase 1                                            | 357.98         | 7.33E-09       | 8.135                            | 2.60E-06 | Norm_PBS x Hyp_PBS<br>Hyp_SEVh x Hyp_PBS<br>Norm_SEVh x Hyp_PBS                                                |
| BAG6         | Large proline-rich protein BAG6                            | 349.14         | 8.10E-09       | 8.092                            | 2.60E-06 | Hyp_SEVh x Hyp_PBS<br>Hyp_SEVh x Norm_PBS<br>Norm_SEVh x Hyp_SEVh                                              |
| SETD7        | Histone-lysine N-methyltransferase SETD7                   | 335.79         | 9.45E-09       | 8.024                            | 2.60E-06 | Norm_PBS x Hyp_PBS<br>Hyp_SEVh x Hyp_PBS<br>Norm_SEVh x Hyp_PBS                                                |
| GCP2         | Gamma-tubulin complex component 2                          | 331.61         | 9.93E-09       | 8.003                            | 2.60E-06 | Norm_SEVh x Hyp_PBS<br>Norm_SEVh x Norm_PBS<br>Norm_SEVh x Hyp_SEVh                                            |
| CL029        | Uncharacterized protein C12orf29                           | 265.05         | 2.41E-08       | 7.617                            | 5.74E-06 | Norm_PBS x Hyp_PBS<br>Hyp_SEVh x Hyp_PBS<br>Norm_SEVh x Hyp_PBS<br>Hyp_SEVh x Norm_PBS<br>Norm_SEVh x Hyp_SEVh |
| KAD4         | Adenylate kinase 4, mitochondrial                          | 196.9          | 7.80E-08       | 7.108                            | 1.70E-05 | Hyp_SEVh x Hyp_PBS<br>Hyp_SEVh x Norm_PBS<br>Norm_SEVh x Hyp_SEVh                                              |
| AEDO         | 2-aminoethanethiol dioxygenase                             | 165.23         | 1.56E-07       | 6.808                            | 3.07E-05 | Norm_PBS x Hyp_PBS<br>Hyp_SEVh x Hyp_PBS<br>Norm_SEVh x Hyp_PBS                                                |
| LYRM7        | Complex III assembly factor LYRM7                          | 162.91         | 1.64E-07       | 6.784                            | 3.07E-05 | Norm_PBS x Hyp_PBS<br>Norm_SEVh x Hyp_PBS<br>Hyp_SEVh x Norm_PBS                                               |

|            |                                                                       |        |          |       |          |                                                                                                                |
|------------|-----------------------------------------------------------------------|--------|----------|-------|----------|----------------------------------------------------------------------------------------------------------------|
|            |                                                                       |        |          |       |          | Norm_SEVh x Hyp_SEVh                                                                                           |
| HSP72      | Heat shock-related 70 kDa protein 2                                   | 153.85 | 2.06E-07 | 6.686 | 3.51E-05 | Norm_PBS x Hyp_PBS<br>Hyp_SEVh x Hyp_PBS<br>Norm_SEVh x Hyp_PBS                                                |
| PAPS1      | Bifunctional 3'-phosphoadenosine 5'-phosphosulfate synthase 1         | 152.18 | 2.15E-07 | 6.668 | 3.51E-05 | Norm_PBS x Hyp_PBS<br>Norm_SEVh x Hyp_PBS<br>Hyp_SEVh x Norm_PBS<br>Norm_SEVh x Hyp_SEVh                       |
| EPS15      | Epidermal growth factor receptor substrate 15                         | 148.61 | 2.36E-07 | 6.627 | 3.63E-05 | Norm_PBS x Hyp_PBS<br>Hyp_SEVh x Hyp_PBS<br>Norm_SEVh x Hyp_PBS                                                |
| RBX1       | E3 ubiquitin-protein ligase RBX1                                      | 144.55 | 2.63E-07 | 6.580 | 3.82E-05 | Norm_PBS x Hyp_PBS<br>Hyp_SEVh x Hyp_PBS<br>Norm_SEVh x Hyp_PBS                                                |
| FBX50      | F-box only protein 50                                                 | 112.57 | 6.99E-07 | 6.156 | 9.62E-05 | Norm_PBS x Hyp_PBS<br>Hyp_SEVh x Hyp_PBS<br>Norm_SEVh x Hyp_PBS                                                |
| BABA1      | BRISC and BRCA1-A complex member 1                                    | 104.13 | 9.47E-07 | 6.024 | 1.24E-04 | Norm_PBS x Hyp_PBS<br>Norm_SEVh x Hyp_PBS<br>Hyp_SEVh x Norm_PBS<br>Norm_SEVh x Hyp_SEVh                       |
| TES        | Testin                                                                | 95.909 | 1.30E-06 | 5.885 | 1.61E-04 | Norm_PBS x Hyp_PBS<br>Hyp_SEVh x Hyp_PBS<br>Norm_SEVh x Hyp_PBS<br>Hyp_SEVh x Norm_PBS<br>Norm_SEVh x Hyp_SEVh |
| GBRL2      | Gamma-aminobutyric acid receptor-associated protein-like 2            | 94.916 | 1.36E-06 | 5.867 | 1.61E-04 | Norm_PBS x Hyp_PBS<br>Norm_SEVh x Hyp_PBS<br>Hyp_SEVh x Norm_PBS<br>Norm_SEVh x Hyp_SEVh                       |
| KPRB       | Phosphoribosyl pyrophosphate synthase-associated protein 2            | 88.195 | 1.80E-06 | 5.744 | 1.93E-04 | Norm_PBS x Hyp_PBS<br>Hyp_SEVh x Norm_PBS<br>Norm_SEVh x Norm_PBS                                              |
| GSTT2;GST2 | Glutathione S-transferase theta-2B; Glutathione S-transferase theta-2 | 87.837 | 1.83E-06 | 5.737 | 1.93E-04 | Norm_PBS x Hyp_PBS<br>Hyp_SEVh x Hyp_PBS<br>Norm_SEVh x Hyp_PBS                                                |
| UCHL5      | Ubiquitin carboxyl-terminal hydrolase isozyme L5                      | 87.735 | 1.84E-06 | 5.735 | 1.93E-04 | Hyp_SEVh x Hyp_PBS<br>Hyp_SEVh x Norm_PBS<br>Norm_SEVh x Hyp_SEVh                                              |
| DDX23      | Probable ATP-dependent RNA helicase DDX23                             | 86.176 | 1.97E-06 | 5.705 | 1.98E-04 | Hyp_SEVh x Hyp_PBS<br>Hyp_SEVh x Norm_PBS<br>Norm_SEVh x Hyp_SEVh                                              |
| COA6       | Cytochrome c oxidase assembly factor 6 homolog                        | 82.576 | 2.33E-06 | 5.633 | 2.25E-04 | Hyp_SEVh x Hyp_PBS<br>Hyp_SEVh x Norm_PBS<br>Norm_SEVh x Hyp_SEVh                                              |

|       |                                        |        |          |       |          |                                                                                                                |
|-------|----------------------------------------|--------|----------|-------|----------|----------------------------------------------------------------------------------------------------------------|
| BID   | BH3-interacting domain death agonist   | 79.736 | 2.66E-06 | 5.575 | 2.46E-04 | Norm_PBS x Hyp_PBS<br>Norm_SEVh x Hyp_PBS<br>Hyp_SEVh x Norm_PBS<br>Norm_SEVh x Hyp_SEVh                       |
| P4HA2 | Prolyl 4-hydroxylase subunit alpha-2   | 79.284 | 2.72E-06 | 5.565 | 2.46E-04 | Norm_PBS x Hyp_PBS<br>Norm_SEVh x Hyp_PBS<br>Hyp_SEVh x Norm_PBS<br>Norm_SEVh x Hyp_SEVh                       |
| CSRP2 | Cysteine and glycine-rich protein 2    | 74.86  | 3.40E-06 | 5.469 | 2.92E-04 | Norm_PBS x Hyp_PBS<br>Norm_SEVh x Hyp_PBS<br>Hyp_SEVh x Norm_PBS<br>Norm_SEVh x Hyp_SEVh                       |
| NEUA  | N-acylneuraminate cytidyltransferase   | 74.487 | 3.46E-06 | 5.461 | 2.92E-04 | Norm_PBS x Hyp_PBS<br>Hyp_SEVh x Hyp_PBS<br>Norm_SEVh x Hyp_PBS<br>Hyp_SEVh x Norm_PBS<br>Norm_SEVh x Hyp_SEVh |
| DBR1  | Lariat debranching enzyme              | 73.861 | 3.58E-06 | 5.446 | 2.92E-04 | Norm_PBS x Hyp_PBS<br>Hyp_SEVh x Norm_PBS<br>Norm_SEVh x Norm_PBS                                              |
| PORIM | Porimin                                | 63.112 | 6.54E-06 | 5.185 | 5.18E-04 | Norm_PBS x Hyp_PBS<br>Norm_SEVh x Hyp_PBS<br>Hyp_SEVh x Norm_PBS<br>Norm_SEVh x Hyp_SEVh                       |
| CYTC  | Cystatin-C                             | 62.636 | 6.73E-06 | 5.172 | 5.18E-04 | Norm_PBS x Hyp_PBS<br>Hyp_SEVh x Norm_PBS<br>Norm_SEVh x Norm_PBS                                              |
| CKAP2 | Cytoskeleton-associated protein 2      | 61.221 | 7.34E-06 | 5.134 | 5.49E-04 | Norm_PBS x Hyp_PBS<br>Norm_SEVh x Hyp_PBS<br>Hyp_SEVh x Norm_PBS<br>Norm_SEVh x Hyp_SEVh                       |
| SNX12 | Sorting nexin-12                       | 58.753 | 8.59E-06 | 5.066 | 6.19E-04 | Norm_PBS x Hyp_PBS<br>Hyp_SEVh x Norm_PBS<br>Norm_SEVh x Norm_PBS                                              |
| CGL   | Cystathionine gamma-lyase              | 58.069 | 8.98E-06 | 5.047 | 6.19E-04 | Norm_PBS x Hyp_PBS<br>Hyp_SEVh x Hyp_PBS<br>Norm_SEVh x Hyp_PBS                                                |
| ACYP1 | Acylphosphatase-1                      | 58.043 | 9.00E-06 | 5.046 | 6.19E-04 | Norm_PBS x Hyp_PBS<br>Norm_SEVh x Hyp_PBS<br>Hyp_SEVh x Norm_PBS<br>Norm_SEVh x Hyp_SEVh                       |
| CD47  | Leukocyte surface antigen CD47         | 57.592 | 9.27E-06 | 5.033 | 6.22E-04 | Hyp_SEVh x Hyp_PBS<br>Hyp_SEVh x Norm_PBS<br>Norm_SEVh x Hyp_SEVh                                              |
| ATG3  | Ubiquitin-like-conjugating enzyme ATG3 | 57.135 | 9.55E-06 | 5.020 | 6.25E-04 | Norm_PBS x Hyp_PBS<br>Norm_SEVh x Hyp_PBS<br>Hyp_SEVh x Norm_PBS<br>Norm_SEVh x Hyp_SEVh                       |

|             |                                                                                                                                                                                  |        |          |       |          |                                                                                          |
|-------------|----------------------------------------------------------------------------------------------------------------------------------------------------------------------------------|--------|----------|-------|----------|------------------------------------------------------------------------------------------|
| KITH        | Thymidine kinase, cytosolic                                                                                                                                                      | 55.105 | 1.10E-05 | 4.960 | 6.99E-04 | Norm_PBS x Hyp_PBS<br>Norm_SEVh x Hyp_PBS<br>Hyp_SEVh x Norm_PBS<br>Norm_SEVh x Hyp_SEVh |
| SRRT        | Serrate RNA effector molecule homolog                                                                                                                                            | 54.119 | 1.17E-05 | 4.930 | 7.31E-04 | Norm_PBS x Hyp_PBS<br>Hyp_SEVh x Norm_PBS<br>Norm_SEVh x Norm_PBS                        |
| PCY2        | Ethanolamine-phosphate cytidyltransferase                                                                                                                                        | 52.442 | 1.32E-05 | 4.879 | 7.95E-04 | Norm_PBS x Hyp_PBS<br>Hyp_SEVh x Hyp_PBS<br>Norm_SEVh x Hyp_PBS                          |
| FKBP9       | Peptidyl-prolyl cis-trans isomerase FKBP9                                                                                                                                        | 52.28  | 1.34E-05 | 4.873 | 7.95E-04 | Norm_PBS x Hyp_PBS<br>Norm_SEVh x Hyp_PBS<br>Hyp_SEVh x Norm_PBS<br>Norm_SEVh x Hyp_SEVh |
| PPCEL       | Prolyl endopeptidase-like                                                                                                                                                        | 51.713 | 1.39E-05 | 4.856 | 8.11E-04 | Norm_PBS x Hyp_PBS<br>Hyp_SEVh x Hyp_PBS<br>Norm_SEVh x Hyp_PBS                          |
| PAPS2       | Bifunctional 3'-phosphoadenosine 5'-phosphosulfate synthase 2                                                                                                                    | 47.31  | 1.95E-05 | 4.710 | 1.11E-03 | Norm_PBS x Hyp_PBS<br>Norm_SEVh x Hyp_PBS<br>Hyp_SEVh x Norm_PBS<br>Norm_SEVh x Hyp_SEVh |
| PP1R7       | Protein phosphatase 1 regulatory subunit 7                                                                                                                                       | 46.568 | 2.07E-05 | 4.684 | 1.15E-03 | Norm_PBS x Hyp_PBS<br>Norm_SEVh x Hyp_PBS<br>Hyp_SEVh x Norm_PBS<br>Norm_SEVh x Hyp_SEVh |
| GAL3B;GAL3A | Glutamine amidotransferase-like class 1 domain-containing protein 3, mitochondrial; Putative glutamine amidotransferase-like class 1 domain-containing protein 3B, mitochondrial | 40.451 | 3.51E-05 | 4.455 | 1.91E-03 | Norm_PBS x Hyp_PBS<br>Norm_SEVh x Hyp_PBS<br>Hyp_SEVh x Norm_PBS<br>Norm_SEVh x Hyp_SEVh |
| HBE         | Hemoglobin subunit epsilon                                                                                                                                                       | 39.618 | 3.79E-05 | 4.421 | 2.02E-03 | Norm_PBS x Hyp_PBS<br>Hyp_SEVh x Hyp_PBS<br>Norm_SEVh x Hyp_PBS                          |
| CHSP1       | Calcium-regulated heat-stable protein 1                                                                                                                                          | 38.468 | 4.23E-05 | 4.373 | 2.21E-03 | Norm_PBS x Hyp_PBS<br>Hyp_SEVh x Hyp_PBS<br>Norm_SEVh x Hyp_PBS                          |
| YLPM1       | YLP motif-containing protein 1                                                                                                                                                   | 33.801 | 6.83E-05 | 4.166 | 3.50E-03 | Hyp_SEVh x Hyp_PBS<br>Hyp_SEVh x Norm_PBS<br>Norm_SEVh x Hyp_SEVh                        |
| GALK1       | Galactokinase                                                                                                                                                                    | 32.469 | 7.91E-05 | 4.102 | 3.98E-03 | Norm_PBS x Hyp_PBS<br>Norm_SEVh x Hyp_PBS<br>Hyp_SEVh x Norm_PBS<br>Norm_SEVh x Hyp_SEVh |
| PICAL       | Phosphatidylinositol-binding clathrin assembly protein                                                                                                                           | 29.018 | 1.19E-04 | 3.924 | 5.88E-03 | Norm_PBS x Hyp_PBS<br>Norm_SEVh x Hyp_PBS<br>Hyp_SEVh x Norm_PBS<br>Norm_SEVh x Hyp_SEVh |

|             |                                                                                                                                                                 |        |          |       |          |                                                                                          |
|-------------|-----------------------------------------------------------------------------------------------------------------------------------------------------------------|--------|----------|-------|----------|------------------------------------------------------------------------------------------|
| STABP       | STAM-binding protein                                                                                                                                            | 28.388 | 1.29E-04 | 3.889 | 6.25E-03 | Norm_PBS x Hyp_PBS<br>Norm_SEVh x Hyp_PBS<br>Hyp_SEVh x Norm_PBS<br>Norm_SEVh x Hyp_SEVh |
| GORS2       | Golgi reassembly-stacking protein 2                                                                                                                             | 26.761 | 1.60E-04 | 3.796 | 7.60E-03 | Norm_PBS x Hyp_PBS<br>Norm_SEVh x Hyp_PBS<br>Hyp_SEVh x Norm_PBS<br>Norm_SEVh x Hyp_SEVh |
| GTR3;GTR14  | Solute carrier family 2, facilitated glucose transporter member 3; Solute carrier family 2, facilitated glucose transporter member 14                           | 25.888 | 1.80E-04 | 3.745 | 8.41E-03 | Norm_PBS x Hyp_PBS<br>Hyp_SEVh x Hyp_PBS<br>Norm_SEVh x Hyp_PBS                          |
| RPB9        | DNA-directed RNA polymerase II subunit RPB9                                                                                                                     | 25.742 | 1.84E-04 | 3.736 | 8.43E-03 | Norm_PBS x Hyp_PBS<br>Hyp_SEVh x Hyp_PBS<br>Norm_SEVh x Hyp_PBS                          |
| KNTC1       | Kinetochore-associated protein 1                                                                                                                                | 25.62  | 1.87E-04 | 3.728 | 8.43E-03 | Norm_PBS x Hyp_PBS<br>Hyp_SEVh x Hyp_PBS<br>Norm_SEVh x Hyp_PBS                          |
| ANLN        | Anillin                                                                                                                                                         | 25.319 | 1.95E-04 | 3.710 | 8.64E-03 | Norm_PBS x Hyp_PBS<br>Norm_SEVh x Hyp_PBS<br>Hyp_SEVh x Norm_PBS<br>Norm_SEVh x Hyp_SEVh |
| TAGL        | Transgelin                                                                                                                                                      | 24.388 | 2.23E-04 | 3.652 | 9.72E-03 | Hyp_SEVh x Hyp_PBS<br>Hyp_SEVh x Norm_PBS<br>Norm_SEVh x Hyp_SEVh                        |
| ZN638       | Zinc finger protein 638                                                                                                                                         | 24.009 | 2.36E-04 | 3.628 | 9.99E-03 | Norm_SEVh x Hyp_PBS<br>Norm_SEVh x Norm_PBS<br>Norm_SEVh x Hyp_SEVh                      |
| CHCH2;CHCH9 | Coiled-coil-helix-coiled-coil-helix domain-containing protein 2; Putative coiled-coil-helix-coiled-coil-helix domain-containing protein CHCHD2P9, mitochondrial | 23.975 | 2.37E-04 | 3.625 | 9.99E-03 | Norm_PBS x Hyp_PBS<br>Norm_SEVh x Hyp_PBS<br>Hyp_SEVh x Norm_PBS<br>Norm_SEVh x Hyp_SEVh |
| ERO1A       | ERO1-like protein alpha                                                                                                                                         | 23.765 | 2.44E-04 | 3.612 | 1.01E-02 | Norm_PBS x Hyp_PBS<br>Norm_SEVh x Hyp_PBS<br>Hyp_SEVh x Norm_PBS<br>Norm_SEVh x Hyp_SEVh |
| BAF         | Barrier-to-autointegration factor                                                                                                                               | 23.567 | 2.52E-04 | 3.599 | 1.03E-02 | Norm_SEVh x Hyp_PBS<br>Norm_SEVh x Norm_PBS<br>Norm_SEVh x Hyp_SEVh                      |
| OSBP1       | Oxysterol-binding protein 1                                                                                                                                     | 22.995 | 2.75E-04 | 3.561 | 1.11E-02 | Norm_PBS x Hyp_PBS<br>Norm_SEVh x Hyp_PBS<br>Hyp_SEVh x Norm_PBS<br>Norm_SEVh x Hyp_SEVh |
| CNPY3       | Protein canopy homolog 3                                                                                                                                        | 22.488 | 2.97E-04 | 3.527 | 1.17E-02 | Norm_PBS x Hyp_PBS<br>Norm_SEVh x Hyp_PBS<br>Hyp_SEVh x Norm_PBS                         |

|            |                                                                                  |        |          |       |          |                                                                                          |
|------------|----------------------------------------------------------------------------------|--------|----------|-------|----------|------------------------------------------------------------------------------------------|
|            |                                                                                  |        |          |       |          | Norm_SEVh x Hyp_SEVh                                                                     |
| CARM1      | Histone-arginine methyltransferase CARM1                                         | 22.373 | 3.03E-04 | 3.519 | 1.17E-02 | Norm_PBS x Hyp_PBS<br>Hyp_SEVh x Norm_PBS<br>Norm_SEVh x Norm_PBS                        |
| ZA2G       | Zinc-alpha-2-glycoprotein                                                        | 22.317 | 3.05E-04 | 3.515 | 1.17E-02 | Norm_PBS x Hyp_PBS<br>Norm_SEVh x Hyp_PBS<br>Hyp_SEVh x Norm_PBS<br>Norm_SEVh x Hyp_SEVh |
| HAT1       | Histone acetyltransferase type B catalytic subunit                               | 22.065 | 3.18E-04 | 3.498 | 1.20E-02 | Norm_PBS x Hyp_PBS<br>Norm_SEVh x Hyp_PBS<br>Hyp_SEVh x Norm_PBS<br>Norm_SEVh x Hyp_SEVh |
| IDI1       | Isopentenyl-diphosphate Delta-isomerase 1                                        | 21.991 | 3.22E-04 | 3.493 | 1.20E-02 | Norm_PBS x Hyp_PBS<br>Norm_SEVh x Hyp_PBS<br>Hyp_SEVh x Norm_PBS<br>Norm_SEVh x Hyp_SEVh |
| UBA6       | Ubiquitin-like modifier-activating enzyme 6                                      | 21.789 | 3.32E-04 | 3.478 | 1.22E-02 | Norm_PBS x Hyp_PBS<br>Hyp_SEVh x Norm_PBS<br>Norm_SEVh x Norm_PBS                        |
| DNM1L      | Dynamin-1-like protein                                                           | 21.661 | 3.39E-04 | 3.469 | 1.23E-02 | Norm_PBS x Hyp_PBS<br>Hyp_SEVh x Norm_PBS<br>Norm_SEVh x Norm_PBS                        |
| TF65       | Transcription factor p65                                                         | 21.325 | 3.58E-04 | 3.446 | 1.28E-02 | Norm_PBS x Hyp_PBS<br>Norm_SEVh x Hyp_PBS<br>Hyp_SEVh x Norm_PBS<br>Norm_SEVh x Hyp_SEVh |
| TOPK       | Lymphokine-activated killer T-cell-originated protein kinase                     | 21.272 | 3.62E-04 | 3.442 | 1.28E-02 | Norm_PBS x Hyp_PBS<br>Norm_SEVh x Hyp_PBS<br>Hyp_SEVh x Norm_PBS<br>Norm_SEVh x Hyp_SEVh |
| HPF1       | Histone PARylation factor 1                                                      | 20.788 | 3.92E-04 | 3.407 | 1.35E-02 | Hyp_SEVh x Hyp_PBS<br>Hyp_SEVh x Norm_PBS<br>Norm_SEVh x Hyp_SEVh                        |
| DLDH       | Dihydrolipoyl dehydrogenase, mitochondrial                                       | 20.767 | 3.93E-04 | 3.405 | 1.35E-02 | Norm_PBS x Hyp_PBS<br>Norm_SEVh x Hyp_PBS<br>Hyp_SEVh x Norm_PBS<br>Norm_SEVh x Hyp_SEVh |
| IPP2;IPP2B | Protein phosphatase inhibitor 2; Protein phosphatase inhibitor 2 family member B | 20.638 | 4.02E-04 | 3.396 | 1.37E-02 | Norm_PBS x Hyp_PBS<br>Hyp_SEVh x Norm_PBS<br>Norm_SEVh x Norm_PBS                        |
| SAP18      | Histone deacetylase complex subunit SAP18                                        | 19.968 | 4.51E-04 | 3.346 | 1.51E-02 | Hyp_SEVh x Hyp_PBS<br>Hyp_SEVh x Norm_PBS<br>Norm_SEVh x Hyp_SEVh                        |
| RL26       | 60S ribosomal protein L26                                                        | 19.904 | 4.56E-04 | 3.341 | 1.51E-02 | Norm_PBS x Hyp_PBS<br>Norm_SEVh x Hyp_PBS<br>Hyp_SEVh x Norm_PBS                         |

|       |                                                   |        |          |       |          |                                                                                          |
|-------|---------------------------------------------------|--------|----------|-------|----------|------------------------------------------------------------------------------------------|
|       |                                                   |        |          |       |          | Norm_SEVh x Hyp_SEVh                                                                     |
| IDHP  | Isocitrate dehydrogenase [NADP], mitochondrial    | 19.478 | 4.92E-04 | 3.308 | 1.61E-02 | Norm_PBS x Hyp_PBS<br>Hyp_SEVh x Norm_PBS<br>Norm_SEVh x Norm_PBS                        |
| H12   | Histone H1.2                                      | 18.579 | 5.79E-04 | 3.237 | 1.87E-02 | Norm_PBS x Hyp_PBS<br>Norm_SEVh x Hyp_PBS<br>Hyp_SEVh x Norm_PBS<br>Norm_SEVh x Hyp_SEVh |
| MD2L1 | Mitotic spindle assembly checkpoint protein MAD2A | 17.398 | 7.26E-04 | 3.139 | 2.31E-02 | Hyp_SEVh x Hyp_PBS<br>Hyp_SEVh x Norm_PBS<br>Norm_SEVh x Hyp_SEVh                        |
| TBB2A | Tubulin beta-2A chain                             | 16.957 | 7.92E-04 | 3.101 | 2.46E-02 | Norm_PBS x Hyp_PBS<br>Norm_SEVh x Hyp_PBS<br>Hyp_SEVh x Norm_PBS<br>Norm_SEVh x Hyp_SEVh |
| GSH1  | Glutamate--cysteine ligase catalytic subunit      | 16.924 | 7.97E-04 | 3.098 | 2.46E-02 | Norm_PBS x Hyp_PBS<br>Norm_SEVh x Hyp_PBS<br>Hyp_SEVh x Norm_PBS<br>Norm_SEVh x Hyp_SEVh |
| ACO13 | Acyl-coenzyme A thioesterase 13                   | 16.919 | 7.98E-04 | 3.098 | 2.46E-02 | Norm_PBS x Hyp_PBS<br>Hyp_SEVh x Norm_PBS<br>Norm_SEVh x Norm_PBS                        |
| AIP   | AH receptor-interacting protein                   | 16.711 | 8.33E-04 | 3.080 | 2.53E-02 | Norm_PBS x Hyp_PBS<br>Hyp_SEVh x Norm_PBS<br>Norm_SEVh x Norm_PBS                        |
| PQBP1 | Polyglutamine-binding protein 1                   | 16.431 | 8.82E-04 | 3.055 | 2.65E-02 | Hyp_SEVh x Hyp_PBS<br>Hyp_SEVh x Norm_PBS<br>Norm_SEVh x Hyp_SEVh                        |
| NDRG1 | Protein NDRG1                                     | 16.27  | 9.12E-04 | 3.040 | 2.71E-02 | Norm_PBS x Hyp_PBS<br>Norm_SEVh x Hyp_PBS<br>Hyp_SEVh x Norm_PBS<br>Norm_SEVh x Hyp_SEVh |
| DSC1  | Desmocollin-1                                     | 16.051 | 9.54E-04 | 3.020 | 2.80E-02 | Norm_PBS x Hyp_PBS<br>Norm_SEVh x Hyp_PBS<br>Hyp_SEVh x Norm_PBS<br>Norm_SEVh x Hyp_SEVh |
| F107B | Protein FAM107B                                   | 15.403 | 1.10E-03 | 2.960 | 3.15E-02 | Norm_PBS x Hyp_PBS<br>Norm_SEVh x Hyp_PBS<br>Hyp_SEVh x Norm_PBS<br>Norm_SEVh x Hyp_SEVh |
| MUCL1 | Mucin-like protein 1                              | 15.397 | 1.10E-03 | 2.960 | 3.15E-02 | Norm_PBS x Hyp_PBS<br>Hyp_SEVh x Hyp_PBS<br>Norm_SEVh x Hyp_PBS                          |
| PDIA1 | Protein disulfide-isomerase                       | 15.129 | 1.16E-03 | 2.934 | 3.31E-02 | Norm_PBS x Hyp_PBS<br>Norm_SEVh x Hyp_PBS<br>Hyp_SEVh x Norm_PBS                         |

|       |                                                    |        |          |       |          |                                                                                          |
|-------|----------------------------------------------------|--------|----------|-------|----------|------------------------------------------------------------------------------------------|
| SRP68 | Signal recognition particle subunit SRP68          | 14.926 | 1.22E-03 | 2.914 | 3.42E-02 | Norm_PBS x Hyp_PBS<br>Norm_SEVh x Hyp_PBS<br>Hyp_SEVh x Norm_PBS<br>Norm_SEVh x Hyp_SEVh |
| COASY | Bifunctional coenzyme A synthase                   | 14.79  | 1.26E-03 | 2.901 | 3.49E-02 | Hyp_SEVh x Hyp_PBS<br>Hyp_SEVh x Norm_PBS<br>Norm_SEVh x Hyp_SEVh                        |
| BPNT1 | 3'(2'),5'-bisphosphate nucleotidase 1              | 14.572 | 1.32E-03 | 2.880 | 3.63E-02 | Norm_PBS x Hyp_PBS<br>Hyp_SEVh x Hyp_PBS<br>Norm_SEVh x Norm_PBS                         |
| RL1D1 | Ribosomal L1 domain-containing protein 1           | 14.084 | 1.48E-03 | 2.831 | 4.02E-02 | Norm_PBS x Hyp_PBS<br>Norm_SEVh x Hyp_PBS<br>Hyp_SEVh x Norm_PBS<br>Norm_SEVh x Hyp_SEVh |
| UBR7  | Putative E3 ubiquitin-protein ligase UBR7          | 13.988 | 1.51E-03 | 2.821 | 4.07E-02 | Norm_PBS x Hyp_PBS<br>Hyp_SEVh x Norm_PBS<br>Norm_SEVh x Norm_PBS                        |
| ASNS  | Asparagine synthetase [glutamine-hydrolyzing]      | 13.848 | 1.56E-03 | 2.807 | 4.17E-02 | Norm_PBS x Hyp_PBS<br>Norm_SEVh x Hyp_PBS<br>Hyp_SEVh x Norm_PBS<br>Norm_SEVh x Hyp_SEVh |
| NQO2  | Ribosyldihydronicotinamide dehydrogenase [quinone] | 13.381 | 1.75E-03 | 2.758 | 4.62E-02 | Norm_PBS x Hyp_PBS<br>Hyp_SEVh x Norm_PBS                                                |
| UBP7  | Ubiquitin carboxyl-terminal hydrolase 7            | 13.046 | 1.90E-03 | 2.722 | 4.96E-02 | Norm_PBS x Hyp_PBS<br>Norm_SEVh x Hyp_PBS<br>Norm_SEVh x Hyp_SEVh                        |

\* FDR: False discovery rate; \*\* Tukey's HSD: Tukey's honest significant difference
