# Supplementary material for: Small Extracellular Vesicles from Hypoxic Triple-Negative Breast Cancer Cells Induce Oxygen-Dependent Cell Invasion
Source: Int J Mol Sci. 2022 Oct 21;23(20):12646. doi: 10.3390/ijms232012646 (PMC9604480; doi:10.3390/ijms232012646)
Supplement: Supplementary file 1 [file ijms-23-12646-s001.zip]

Archive with 6 entries (6 files):
- Figure S1. Additional Methods.tif
- Figure S2. Invasion 24h.tif
- Figure S3. Morphology.tif
- Supplementary Figure Legends.pdf
- Table S1.Differential proteomic profile of SEVh.pdf
- Table S2.Differential proteomic profile of MDA-MB-231 cells .pdf
